# Supplementary material for: Exact tailoring of an ATP controlled streptavidin binding aptamer
Source: Royal Society of Chemistry journal article supplement (doi:10.1039/c4ra00714j), 2014-01-01
Supplement: c4ra00714j1.pdf [file c4ra00714j1.pdf]

## Exact tailoring of an ATP controlled streptavidin-binding aptamer

Tao Bing,<sup>‡a</sup>Hongcheng Mei,<sup>‡ab</sup>NanZhang,<sup>a</sup>Cui Qi,<sup>a</sup>Xiangjun Liu,<sup>a</sup>Dihua

Shangguan<sup>\*a</sup>

<sup>a</sup>Beijing National Laboratory for Molecular Sciences, Key Laboratory of Analytical Chemistry for Living Biosystems, Institute of Chemistry, Chinese Academy of Sciences, Beijing, 100190, China;

<sup>b</sup>Institute of Forensic Science, Ministry of Public Security, Beijing 100038, China

\*Corresponding author E-mail: sgdh@iccas.ac.cn (Dr. D. Shangguan), Tel & Fax: 86-10-62528509

### Experimental section

#### 1. Materials

DNA sequences were synthesized and purified by Sunbiotech Co. Ltd. (Beijing, China). Streptavidin coated sepharose beads (Streptavidin Sepharose High Performance) were obtained from GE Healthcare Bio-Sciences AB (GE Healthcare, Sweden). Adenosine triphosphate (ATP) was obtained from Beijing Xinjingke Biotechnology (Beijing, China). Guanosine triphosphate (GTP), uridine triphosphate (UTP) and Cytidine triphosphate (CTP) were purchased from Sigma-Adirich (St. Louis, MO). 20×SYBR-green I (20 mg/mL) in dimethylsulfoxide (DMSO) was obtained from Fanbo Biochemicals (Beijing, China), 1×SYBR-green I (20 mg/mL) was prepared by diluting 20×SYBR-green I with DMSO. RPMI 1640 medium (Gibico) and fetal calf serum were purchased from Life Technologies Corporation (USA). Plasma was obtained from Beijing Red Cross Blood Center. Prior to use, non-soluble matter was removed by centrifugation at 10,000 rpm for 15 min. The buffer used for all experiments, unless otherwise indicated, was Tris-HCl buffer with 25 mM Tris-HCl, 120 mM NaCl, 5 mM KCl, 3 mM MgCl<sub>2</sub> and 0.02% Tween20, pH 7.4. The deionized water was prepared on a UPHW-III-90T UP water purification system (Chengdu, China). All the fluorescence measurements were recorded by SpectraMax M5 (Molecular. Devices Corporation, USA).

## **2. The binding ability of Fused Allosteric Aptamer**

100  $\mu\text{L}$  of 0.5  $\mu\text{M}$  FAA (FAA-1 or FAA-2) was incubated with 1mM ATP and 10  $\mu\text{L}$  of streptavidin coated beads at 25°C for 20 min with slight shaking. After incubation, the sample was transferred to an empty column and washed with 50  $\mu\text{L}$  of Tris-HCl buffer. Then the streptavidin coated beads was transferred to a 96-well plate (Costar), and added 10  $\mu\text{L}$  1 $\times$ SYBR green I and 90  $\mu\text{L}$  Tris-HCl buffer. After mixing, the fluorescence intensity was measured by SpectraMax M5 with excitation at 485 nm and emission at 525 nm.

## **3. CD spectra measurement**

CD spectra (220-300 nm) were collected on a Jasco J-815 circular dichroism spectropolarimeter (JASCO, Japan) at a rate of 500 nm/min in a fused quartz cell (400  $\mu\text{L}$  1 cm). Measurements were carried out in Tris-HCl buffer at room temperature. The CD spectra were applied background subtraction, and smoothed.

## **4. Fluorescence response of FAA-2 to different concentrations of ATP**

100  $\mu\text{L}$  of 0.5  $\mu\text{M}$  FAA-2 was incubated with different concentrations of ATP and 10  $\mu\text{L}$  of streptavidin coated beads at 25 °C for 20 min with slight shaking. After incubation, the sample was transferred to an empty column and washed with 50  $\mu\text{L}$  of Tris-HCl buffer. Then the streptavidin coated beads was transferred to a 50  $\mu\text{L}$  centrifuge tube and added 10  $\mu\text{L}$  1 $\times$ SYBR green I. After shaking, the fluorescence was observed under UV-light and photographed. Then the sample was transferred to a 96-well plate (Costar) and added 90  $\mu\text{L}$  of Tris-HCl buffer. After mixing, the fluorescence intensity was measured by SpectraMax M5 with excitation at 485 nm and emission at 525 nm

## **5. Selectivity of FAA-2**

100  $\mu\text{L}$  of 0.5  $\mu\text{M}$  FAA-2 contained 10  $\mu\text{L}$  of streptavidin coated beads was incubated with 1 mM ATP, GTP, UTP or CTP at 25 °C for 20 min with slight shaking. After incubation, the sample was transferred to an empty column and washed with 50  $\mu\text{L}$  of Tris-HCl buffer. The streptavidin coated beads were transferred to a 96-well plate and then added 10  $\mu\text{L}$  of 1 $\times$ SYBR green I and 90  $\mu\text{L}$  of Tris-HCl buffer. After mixing, the fluorescence intensity was measured by SpectraMax M5 with excitation at 485 nm and emission at 525 nm.

## **6. Measurement of apparent equilibrium dissociation constant (Kd)**

The affinity of FAA-2 to streptavidin was measured by incubating different of FAM labeled FAA-2 with 2 $\mu$ L streptavidin-coated beads in the present of 2mM ATP at 25°C for 20 min with slight shaking. After incubation, the concentrations of free FAA-2 were determined by measuring the fluorescence intensity of supernatant. The streptavidin coated beads were washed with 100  $\mu$ L binding buffer in the present of 2mM ATP, then the bound FAA-2 were eluted with 150  $\mu$ L of 5mM biotin. The amounts of bound aptamers were calculated from the fluorescence intensities of the eluates. The apparent  $K_d$  of FAA-2 to streptavidin was obtained by fitting the amount of bound aptamers against the concentration of free aptamers to the equation  $Y = B_{max} X / (K_d + X) + Ns * x$ , using SigmaPlot (Jandel, San Rafael, CA).

## **7. Response of FAA-2 to ATP in biological sample**

100  $\mu$ L of 0.5  $\mu$ M FAA-2 was incubated with 0 or 1 mM ATP and 10  $\mu$ L of streptavidin coated beads in 30% human plasma, 30% RPMI 1640 medium (with/without 10% fetal calf serum) at 25°C for 20 min with slight shaking. After incubation, the sample was transferred to an empty column and washed with 50  $\mu$ L of Tris-HCl buffer. The streptavidin coated beads were transferred to a 96-well plate and then added 10  $\mu$ L of 1 $\times$ SYBR green I and 90  $\mu$ L Tris-HCl buffer. After mixing, they were measured on a 96-well plate (Costar) by SpectraMax M5 with excitation at 485 nm and emission at 525 nm.

## **8. Regeneration of streptavidin coated beads**

100  $\mu$ L of 0.5  $\mu$ M FAA-2 was incubated with 1 mM ATP and 10  $\mu$ L of streptavidin coated beads at 25°C for 20 min with slight shaking. After incubation, the sample was transferred to an empty column and washed with 50  $\mu$ L of Tris-HCl buffer. The streptavidin coated beads was transferred to a 96-well plate, and then added 10  $\mu$ L of 1 $\times$ SYBR green I and 90  $\mu$ L Tris-HCl buffer. After mixing, they were measured on a 96-well plate (Costar) by SpectraMax M5 with excitation at 485 nm and emission at 525 nm. The beads were transferred to an empty column and washed with 50  $\mu$ L of 10% DMSO. Regeneration of the streptavidin coated beads was performed by washing with 2 $\times$ 50  $\mu$ L of Tris-HCl buffer. Then the regenerated streptavidin coated beads were incubated with FAA-2 and ATP mixture and treated as described above for additional 5 times.

Table S1. Sequences of the DNA strands used.

| Name  | Sequences( From 5' to 3')                            |
|-------|------------------------------------------------------|
| FAA-1 | ACCTGGGGGAGTATACCGCTGTGTGACGCAACACTTGCGGAGGAAGGT     |
| FAA-2 | ATACCTGGGGGAGTATACCGCTGTGTGACGCAACACTAGCGGAGGAAGGTAT |

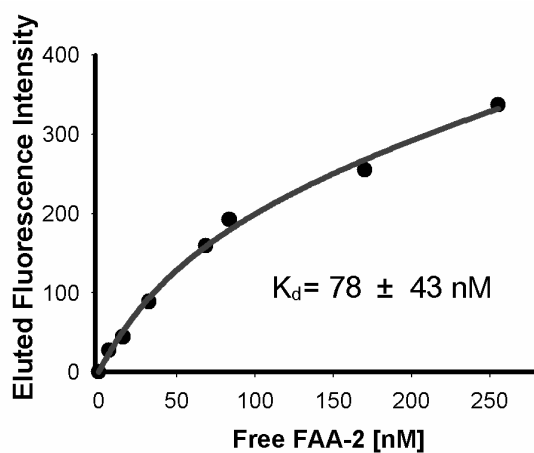

Fig S1 Binding curves of FAA-2 on streptavidin-coated beads in the presence of 2mM ATP.

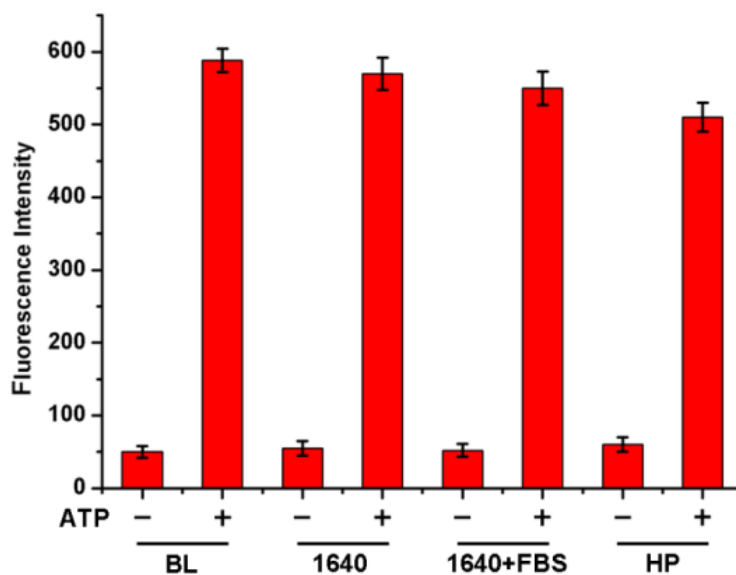

Fig. S2 Response of FAA-2 (0.5  $\mu$ M) to 1 mM ATP in biological samples (BL: Tris-HCl buffer; 1640: 30% RPMI 1640 cell culture medium; 1640+FBS: 30% RPMI 1640 medium with 10% fetal calf serum; HP: 30% human plasma).

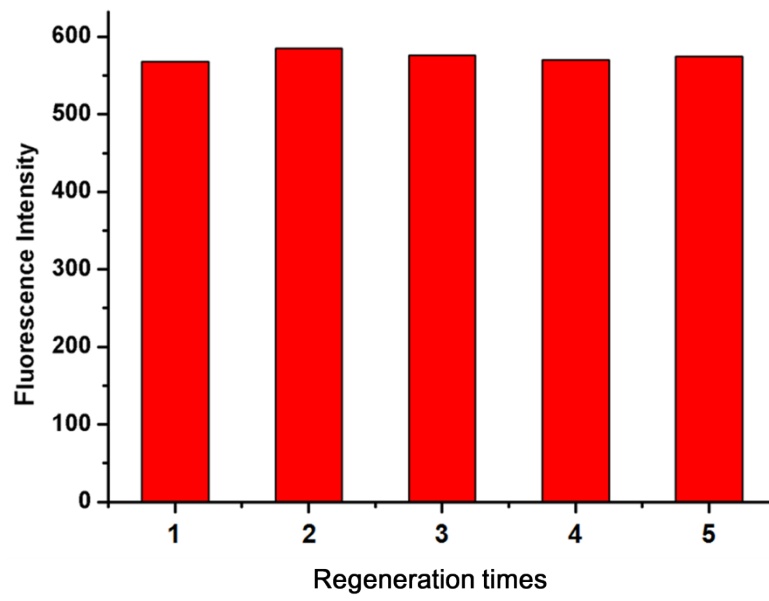

**Fig. S3** The binding of FAA-2 on the reused streptavidin coated beads in the present of 1 mM ATP.
